# Supplementary material for: Assessing the Probiotic Effects of Pediococcus pentosaceus CACC616 in Weaned Piglets
Source: MDPI journal article supplement (doi:10.3390/microorganisms11122890), 2023-11-30
Supplement: s1 [file s1]

***Supplementary Material***  
**Assessing the probiotic effects of *Pediococcus pentosaceus***  
**CACC616 in weaned piglets**

**Park et al.**

**Table S1. Primer sequences used in this study.**

| Target gene                   | Forward primer              | Reverse primer             |
|-------------------------------|-----------------------------|----------------------------|
| <i>IL-1<math>\beta</math></i> | 5'-CCTGGGCTGTCCTGATGAGAG-3' | 5'-CGGGAAAGACACAGGTA-3'    |
| <i>IL-6</i>                   | 5'-AGTCCGGAGAGGAGACTTCA-3'  | 5'-ATTTCACGATTTCACAGAG-3'  |
| <i>IL-10</i>                  | 5'-TGGGTTGCCAAGCCTTATCG-3'  | 5'-TTCAGCTTCTCACCCAGGGA-3' |
| <i>GAPDH</i>                  | 5'-GGCCTTCCGTGTTCTTAC-3'    | 5'-TGCCTGCTTCACCACCTTC-3'  |

Control: non-supplement diet. Probiotic composition: normal diet supplemented with *P. pentosaceus* CACC616.

**Table S2. Total nutrient levels of the basal diets for pigs (air-dry basis; %)**

| <b>Items</b>               | <b>Phase I<br/>(D0–9)</b> | <b>Phase II<br/>(D10–20)</b> | <b>Phase III<br/>(D21–26)</b> |
|----------------------------|---------------------------|------------------------------|-------------------------------|
| Digestible energy, Mcal/kg | 3.40                      | 3.40                         | 3.60                          |
| Crude protein, %           | 20.0 ± 0.2                | 19.7 ± 0.2                   | 17.9 ± 0.0                    |
| Crude fat, %               | 7.05 ± 0.2                | 5.36 ± 0.1                   | 6.3 ± 0.3                     |
| Crude fiber, %             | 1.8 ± 0.1                 | 2.5 ± 0.1                    | 2.4 ± 0.2                     |
| Crude ash, %               | 5.8 ± 0.1                 | 5.3 ± 0.1                    | 5.3 ± 0.1                     |
| Lysine, %                  | 1.35                      | 1.20                         | 1.10                          |
| Calcium, %                 | 0.50                      | 0.50                         | 0.50                          |
| Phosphorus, %              | 0.80                      | 0.70                         | 0.70                          |
| Alanine, %                 | 0.95                      | 0.91                         | 0.85                          |
| Arginine, %                | 1.16                      | 1.16                         | 1.08                          |
| Cystine, %                 | 0.54                      | 0.43                         | 0.41                          |
| Glutamic acid, %           | 3.33                      | 3.42                         | 3.15                          |
| Glycine, %                 | 0.81                      | 0.84                         | 0.68                          |
| Histidine, %               | 0.57                      | 0.49                         | 0.46                          |
| Isoleucine, %              | 0.79                      | 0.76                         | 0.68                          |
| Leucine, %                 | 1.72                      | 1.55                         | 1.53                          |
| Lysine, %                  | 1.73                      | 1.40                         | 1.37                          |
| Methionine, %              | 0.42                      | 0.35                         | 0.30                          |
| Phenylalanine, %           | 0.93                      | 0.90                         | 0.84                          |
| Proline, %                 | 1.19                      | 1.19                         | 1.12                          |
| Valine, %                  | 0.99                      | 0.92                         | 0.79                          |
| Tyrosine, %                | 0.00                      | 0.56                         | 0.55                          |
| Tryptophan, %              | 0.26                      | 0.20                         | 0.19                          |

**Table S3. Effect of dietary *P. pentosaceus* CACC616 supplementation on nutrient digestibility**

| Groups        | Control    | <i>P. pentosaceus</i> CACC616 |
|---------------|------------|-------------------------------|
| Moisture      | 72.8 ± 2.0 | 76.7 ± 0.5                    |
| Dry matter    | 27.2 ± 2.0 | 23.3 ± 0.5                    |
| Crude protein | 26.8 ± 1.3 | 29.8 ± 0.8                    |
| Crude fiber   | 7.3 ± 0.3  | 8.3 ± 0.5                     |
| Crude fat     | 10.7 ± 1.5 | 10.3 ± 1.6                    |
| Crude ash     | 11.9 ± 0.3 | 12.0 ± 0.4                    |

All values are expressed as mean ± SEM ( $n = 5$ ). Control: non-supplement diet. Probiotic composition: normal diet supplemented with *P. pentosaceus* CACC616.

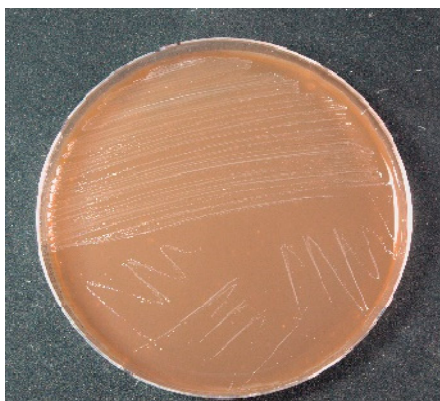

**Figure S1. Hemolytic activity.**

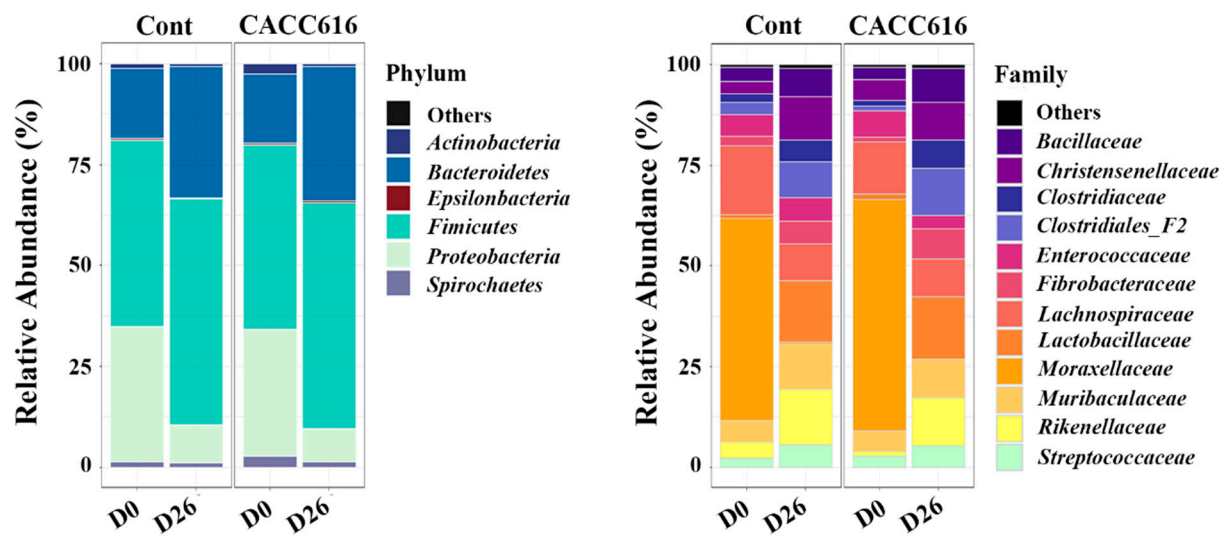

**Figure S2. Effect of dietary *P. pentosaceus* CACC616 supplementation on intestinal microbiota composition in weaned piglets.** Relative abundance bar plot at the phylum and family level. All values are expressed as mean  $\pm$  SEM ( $n = 20$ ). Control: non-supplement diet. Probiotic composition: normal diet supplemented with *P. pentosaceus* CACC616.

**A**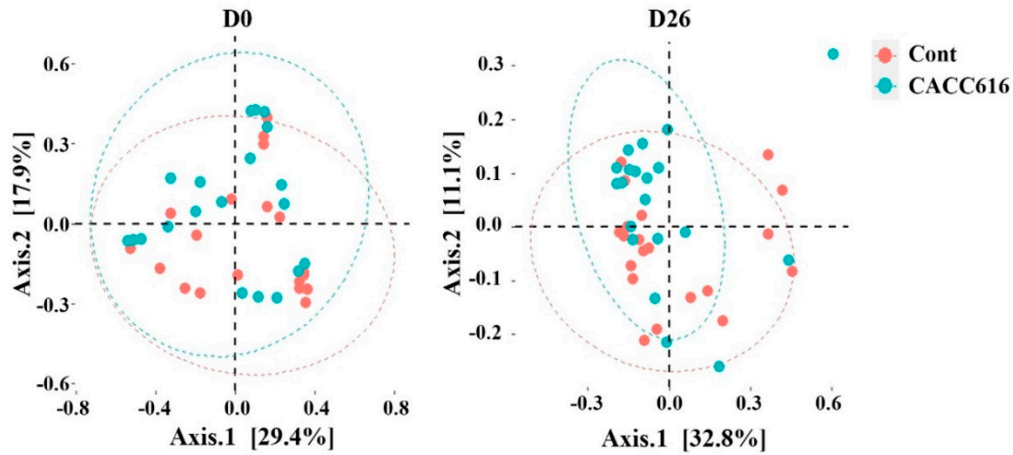**B**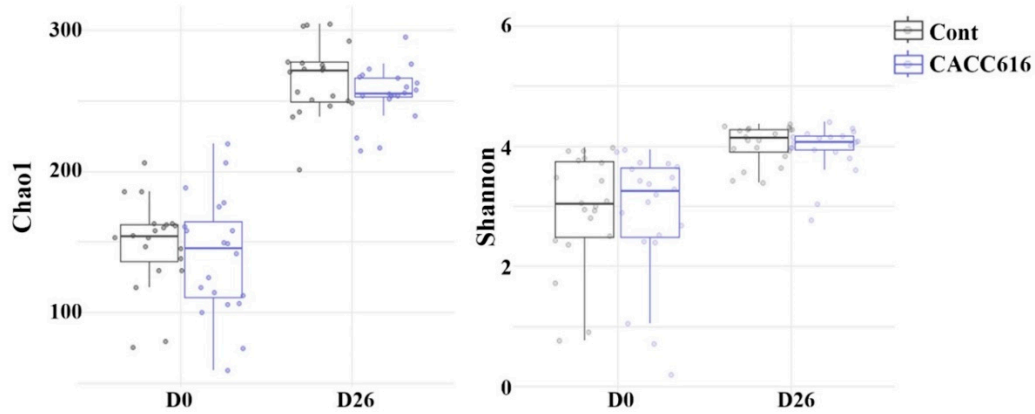

**Figure S3. Intestinal microbiota richness, difference of microbiome structure on alpha and beta-diversity at genus level.** (A) comparison of beta-diversity based on Principal coordinate analysis (PCoA), (B) alpha-diversity index (Chao1 and Shannon) between CACC616 and control groups. All values are expressed as mean  $\pm$  SEM ( $n = 20$ ). Control: non-supplement diet. Probiotic composition: normal diet supplemented with *P. pentosaceus* CACC616.
